# Supplementary material
Source: publisher figshare collection journal article supplement (https://sage.figshare.com/ndownloader/files/18615842)
Supplement: Supplementary file 1 [file 18615842]

Table 1. Claims forms by country

| **Country** | **Non Protest Claims** | **Protest Claims** | **Chi square test** |
| --- | --- | --- | --- |
| France | 84,0% | 16,0% | *43.009, p=.000* |
| Germany | 92,2% | 7,8% | *.137, p=.711* |
| Greece | 88,1% | 11,9% | *6.350, p=.012* |
| Italy | 84,1% | 15,9% | *32.613, p=.000* |
| Poland | 91,6% | 8,4% | *.787, p=.375* |
| Spain | 91,5% | 8,5% | *.035, p=.851* |
| Sweden | 96,9% | 3,1% | *24.259, p=.000* |
| Switzerland | 96,8% | 3,2% | *19.564, p=.000* |
| U.K. | 96,6% | 3,4% | *18.715, p=.000* |
| **Total** | **91,3%** | **8,7%** |  |

Table 2. Distribution of protest claims by subtypes

| **Form of action categories** | | | | | |
| --- | --- | --- | --- | --- | --- |
|  | | **Frequency** | **Percent** | **Valid Percent** | **Cumulative Percent** |
| Valid | Demonstrative protest actions (50) (nonviolent) | 227 | 64,7 | 64,7 | 64,7 |
| Confrontational protest actions (60) | 70 | 19,9 | 19,9 | 84,6 |
| Violent and Sabotage protest actions (70) | 54 | 15,4 | 15,4 | 100,0 |
| **Total** | **351** | **100,0** | **100,0** |  |

Table 3. Claimants by Claim type

| **Type of Senders** | **Non Protest Claims** | **Protest Related Claims** | **Chi square test** | **Total** |
| --- | --- | --- | --- | --- |
| State actors and judiciary | 31,3% | 2,0% | *134.741, p=000* | 29,0% |
| Political parties/groups | 10,7% | 2,6% | *23.704, p=.000* | 10,1% |
| Professional organizations and groups | 10,3% | 0,9% | *33.293, p=.000* | 9,5% |
| Labor organizations and Economy related groups | 3,7% | 4,0% | *.095, p=.758* | 3,7% |
| Education related actors | 13,5% | 5,4% | *18,838, p=.000* | 12,9% |
| Youth Actors | 16,4% | 74,1% | *652.614, p=.000* | 20,9% |
| Other civil society organizations and groups | 12,3% | 6,3% | *11.336, p=.001* | 11,9% |
| Other Actors | 1,9% | 4,8% | *13.575, p=.000* | 2,1% |
| Total | 100,0% | 100,0% |  | 100,0% |
